# Supplementary material
Source: publisher figshare collection journal article supplement (https://acs.figshare.com/ndownloader/files/11321462)
Supplement: Supplementary file 1 [file 11321462]

## Supporting Information

### **Homogeneously Dispersed Co<sub>9</sub>S<sub>8</sub> Anchored on Nitrogen and Sulfur Co-Doped Carbon Derived from Soybean as Bifunctional Oxygen Electrocatalysts and Supercapacitor**

*Zhen Xiao<sup>1†</sup>, Guozheng Xiao<sup>1</sup>, Minhao Shi<sup>1</sup>, Ying Zhu<sup>1,2\*</sup>*

<sup>1</sup>Key Laboratory of Bio-Inspired Smart Interfacial Science and Technology of Ministry of Education, School of Chemistry, Beihang University, Beijing, 100191, P.R. China

<sup>2</sup>Beijing Advanced Innovation Center for Biomedical Engineering, Beihang University, Beijing, 100191, P.R. China.

Email: zhuying@buaa.edu.cn

## Experimental

Characterizations. The morphologies of the cobalt-containing freeze-dried soybeans and CoS@NSC-X catalysts were observed by Field Emission Scanning Electron Microscopy (FESEM, JEOL7500) and Transmission Electron Microscopy (TEM, JEOL JEM-2100F). Molecular structures of all samples were characterized by X-ray photoelectron spectroscopy (XPS), X-ray diffraction (XRD) and Raman spectroscopy. XPS spectra were collected on the Thermo Scientific ESCALab 250Xi using 200 W monochromated Al K $\alpha$  radiation. TZY-XRD (D/MAX-TTR $\square$ , Cu K $\alpha$ ) was used to get the XRD pattern. Raman spectra were recorded on a JobinYvon (Laboratory RAM HR1800) confocal micro-Raman spectrometer backscattered geometry through a 10 $\times$ (NA=0.25) microscope objective. An Ar<sup>+</sup> laser emitting at a wavelength of 514.5 nm was used as a source of excitation. Thermo-gravimetric analysis (TGA) analysis of dried rose petals was carried out on Thermo-LABSYS evo TGA sensor in nitrogen atmosphere. Nitrogen absorption/desorption isotherm was performed with ASAP 2020M (Micromeritics, USA) to obtain Bunauer-Emmett-Teller (BET) specific surface area. The pore size distribution was obtained from the adsorption branch of the isotherms derived from the Barrett-Joyner-Halenda (BJH) analysis.

**Table S1. The XPS elemental analyses of the as-prepared samples**

|                   | C1s    | O1s    | N1s   | S2p   | Co2p  |
|-------------------|--------|--------|-------|-------|-------|
| Soybean Precursor | 60.76% | 22.4%  | 6.92% | 2.54% | /     |
| NSC-700           | 78.73% | 14.4%  | 4.91% | 1.29% | /     |
| NSC-800           | 83.11% | 14.22% | 1.83% | 0.74% | /     |
| NSC-800           | 85.45% | 12.59% | 0.96% | 0.18% | /     |
| CoS@NSC-700       | 78.13% | 10.67% | 9.2%  | 1.96% | 1.05% |
| CoS@NSC-800       | 85.02% | 8.14%  | 5.31% | 1.82% | 0.78% |
| CoS@NSC-900       | 89.19% | 6.97%  | 2.2%  | 1.15% | 0.55% |

**Table S2. Content of different types of nitrogen in CoS@NSC-700, CoS@NSC-800 and CoS@NSC-900 based on the high-resolution spectra of N1s.**

|             | CoS@NSC-700 | CoS@NSC-800 | CoS@NSC-900 |
|-------------|-------------|-------------|-------------|
| Pyridine N  | 21.4%       | 23.5%       | 26.8%       |
| Pyrrolic N  | 45.5%       | 25.3%       | 50.6%       |
| Graphitic N | 24.3%       | 43.4%       | 17.5%       |
| Oxidized N  | 8.8%        | 7.8%        | 5.1%        |

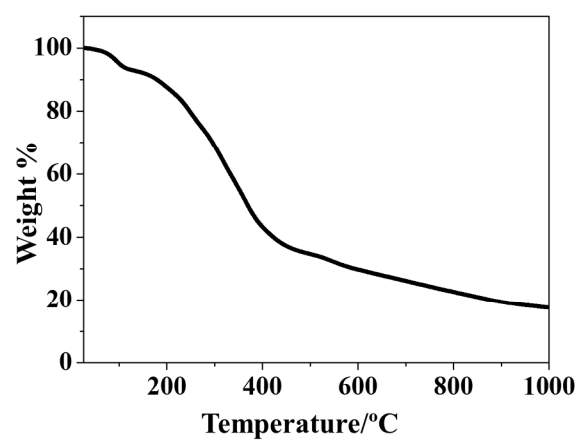

Figure S1. Thermogravimetric analysis curve of soybean precursor after KOH-(NH<sub>4</sub>)<sub>2</sub>S<sub>2</sub>O<sub>8</sub> treatment.

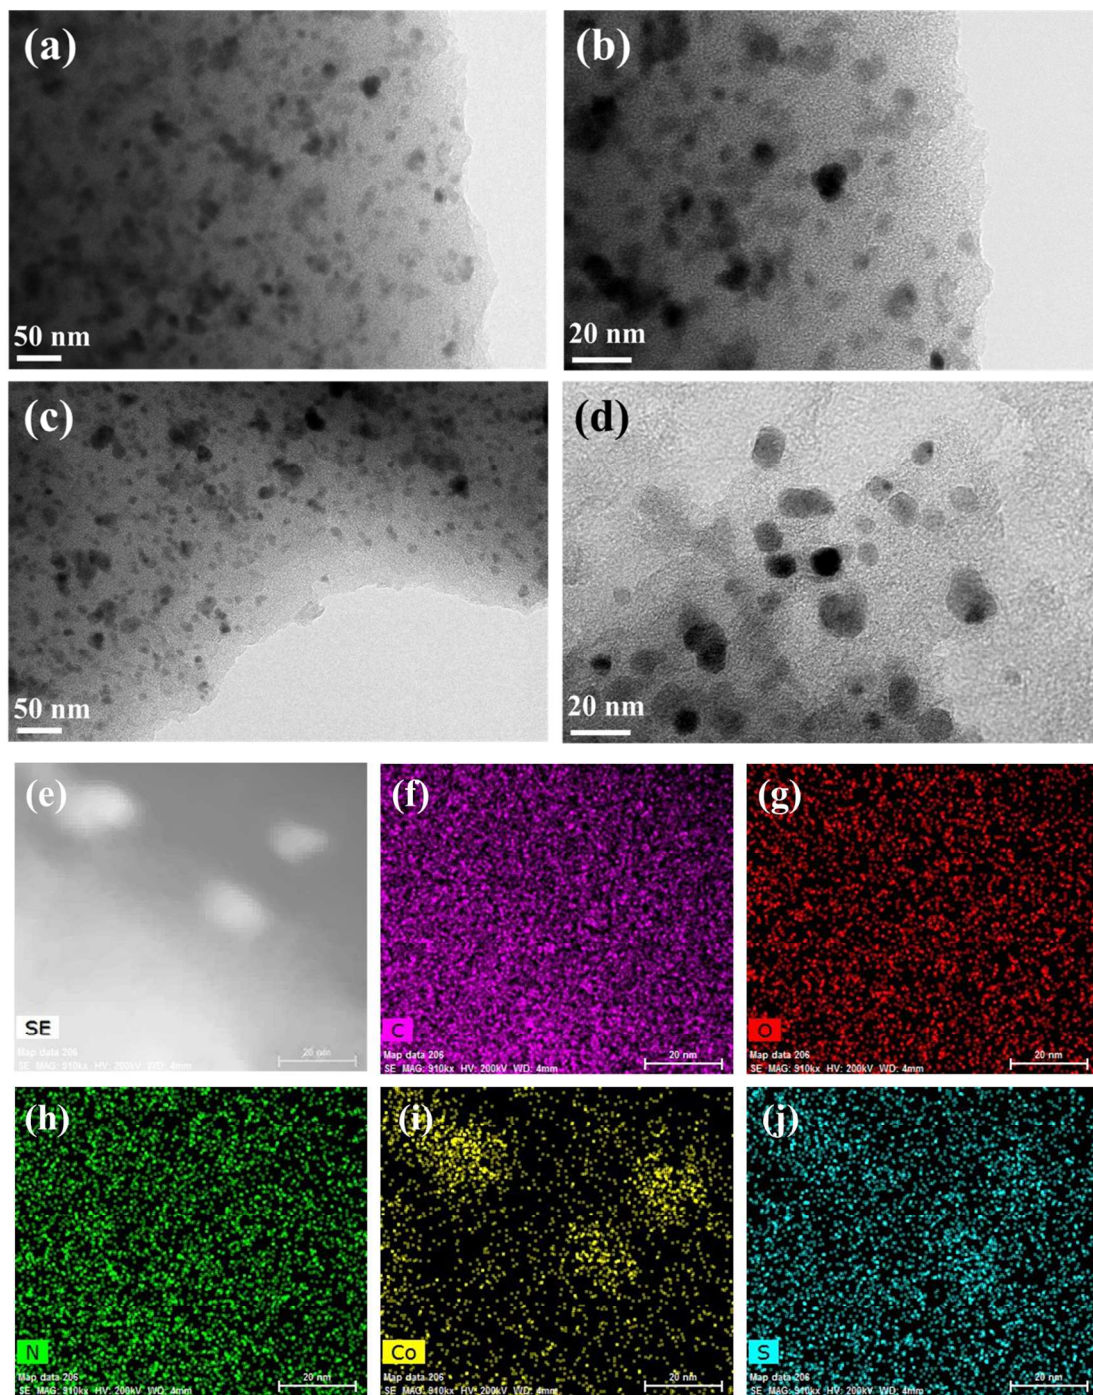

**Figure S2.** TEM images of the as-prepared CoS@NSC-700 (a, b) and CoS@NSC-900 (c, d); (e-k) the element mapping images for CoS@NSC-800.

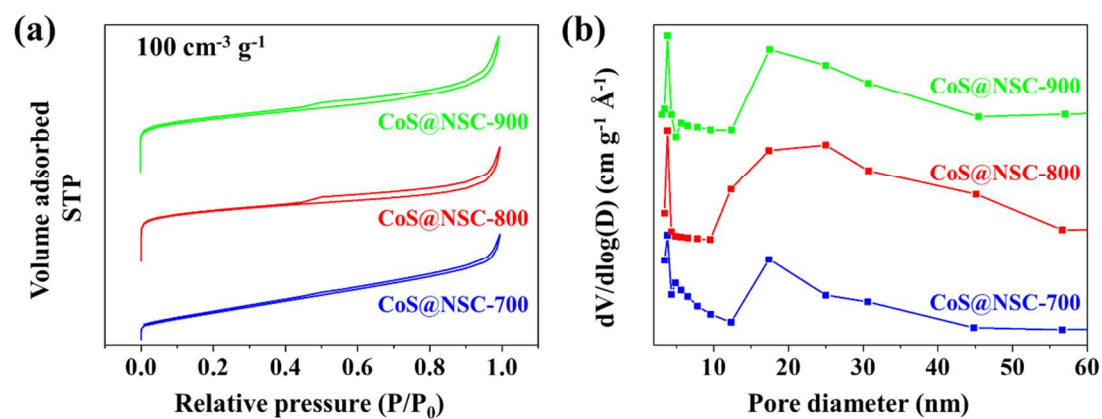

Figure S3. (a) The Nitrogen adsorption-desorption isotherms of CoS@NSC-700, CoS@NSC-800 and CoS@NSC-900. (b) The corresponding pore-size distribution by analysis of adsorption branch using Barrett-Joyner-Halenda (BJH) method.

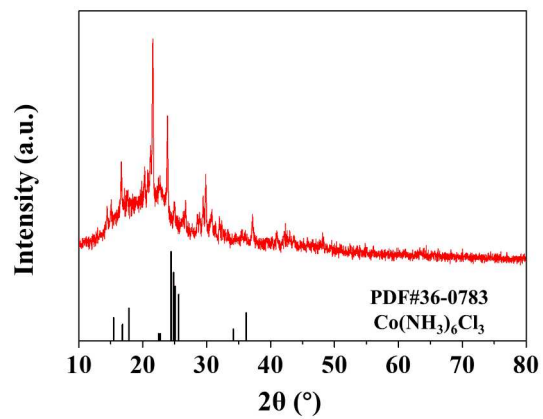

**Figure S4.** The XRD pattern of soybean precursor after  $\text{KOH}-(\text{NH}_4)_2\text{S}_2\text{O}_8$  treatment.



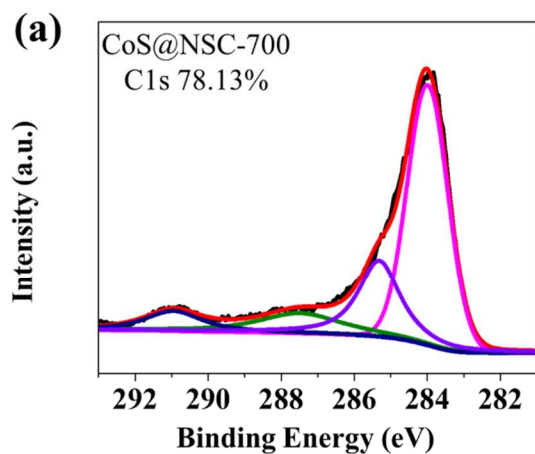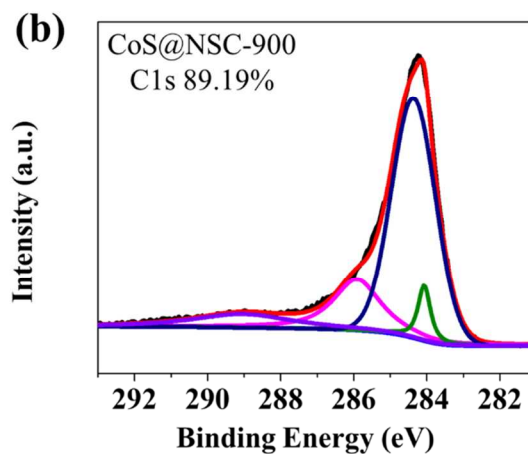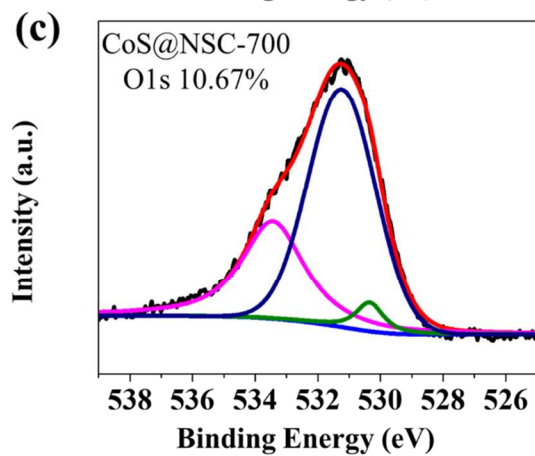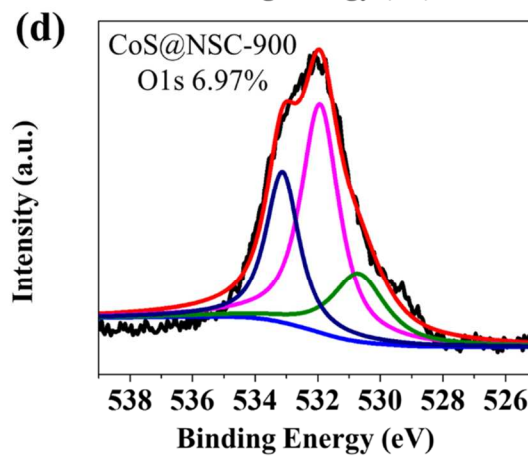

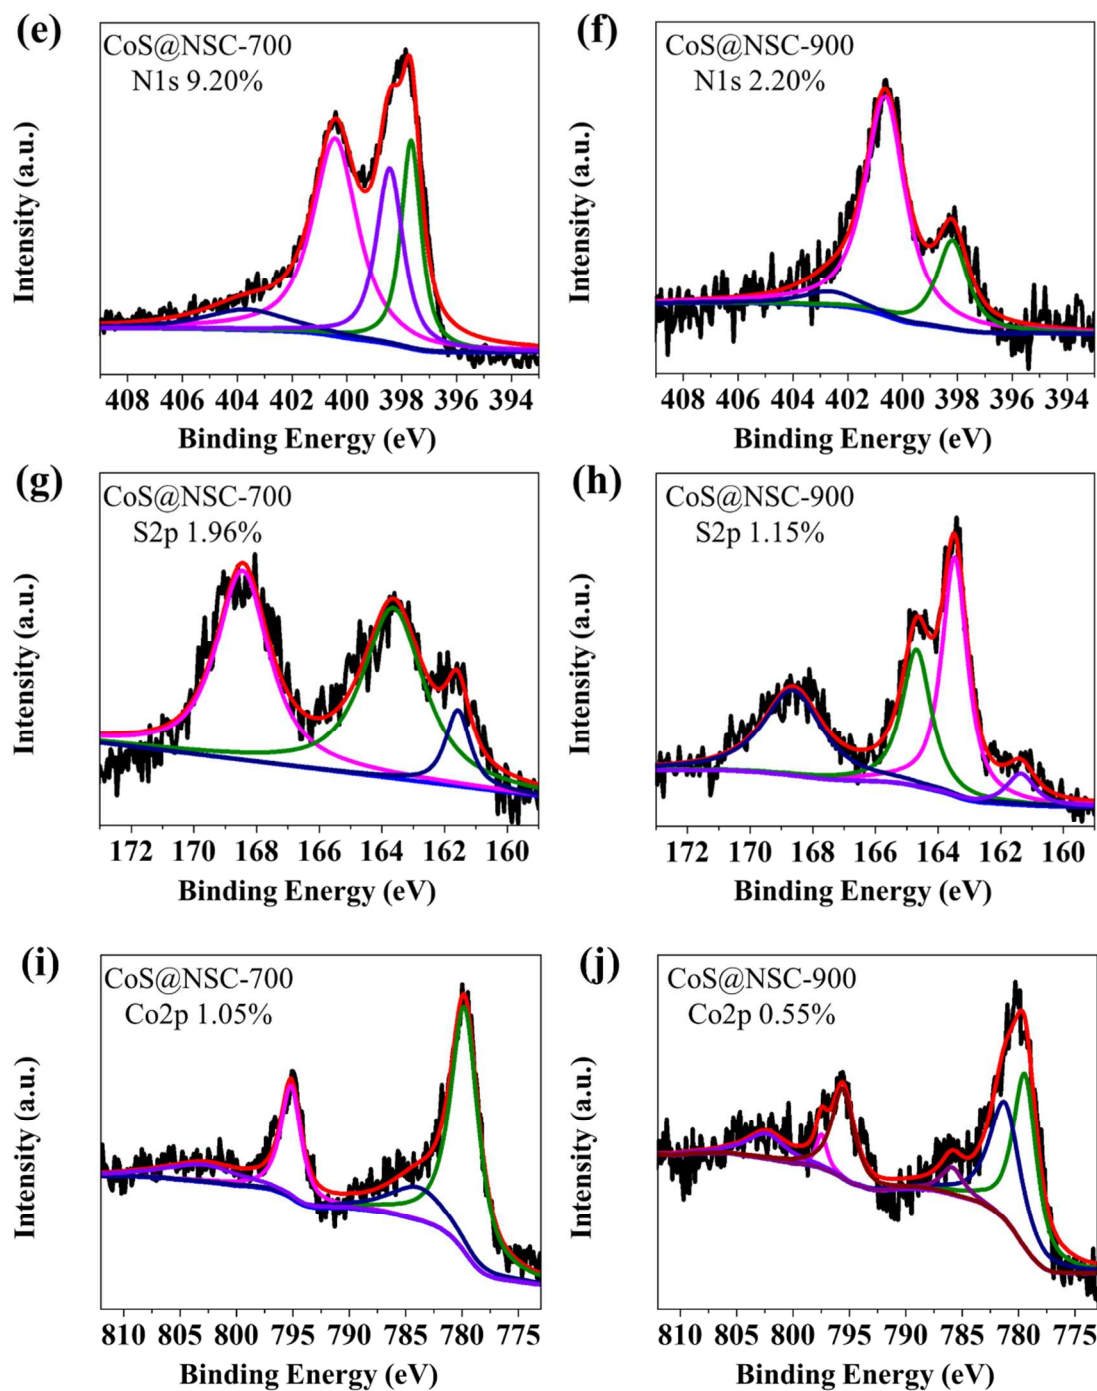

Figure S5. high-resolution spectra of (a, b) C1s, (c, d) O1s, (e, f) N1s, (g, h) S2p, and (i, j) Co2p3 for the as-prepared CoS@NSC-700 and CoS@NSC-900, respectively.

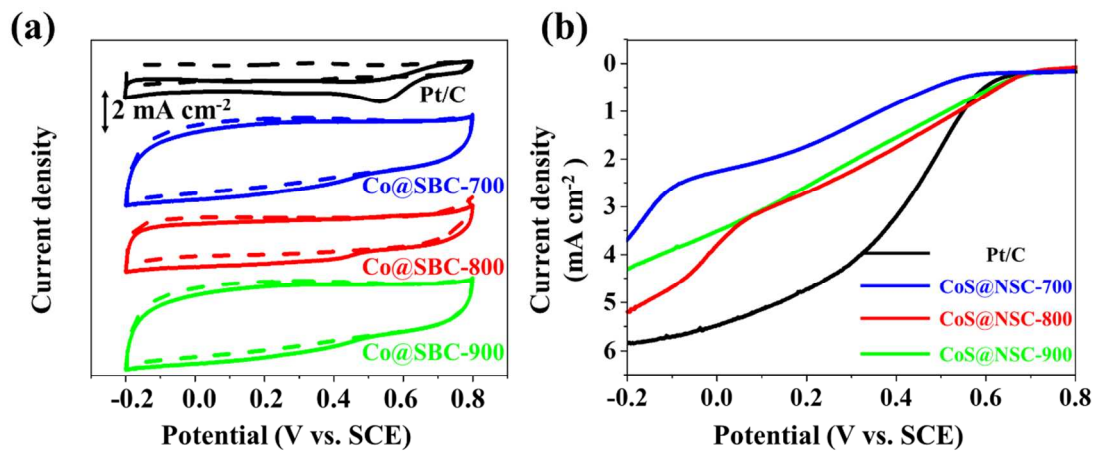

Figure S6. (a) CV curves of CoS@NSC-700, CoS@NSC-800, CoS@NSC-900 and commercial Pt/C in O<sub>2</sub> (solid lines) or N<sub>2</sub> (dash lines) saturated 0.1 M HClO<sub>4</sub> solution with a scan rate of 50 mV S<sup>-1</sup>. (b) LSV curves of CoS@NSC-700, CoS@NSC-800, CoS@NSC-900 and Pt/C catalysts on RDE in O<sub>2</sub> saturated 0.1 M HClO<sub>4</sub> solution with a scan rate of 10 mV S<sup>-1</sup> and rotation speed of 2000 rpm.

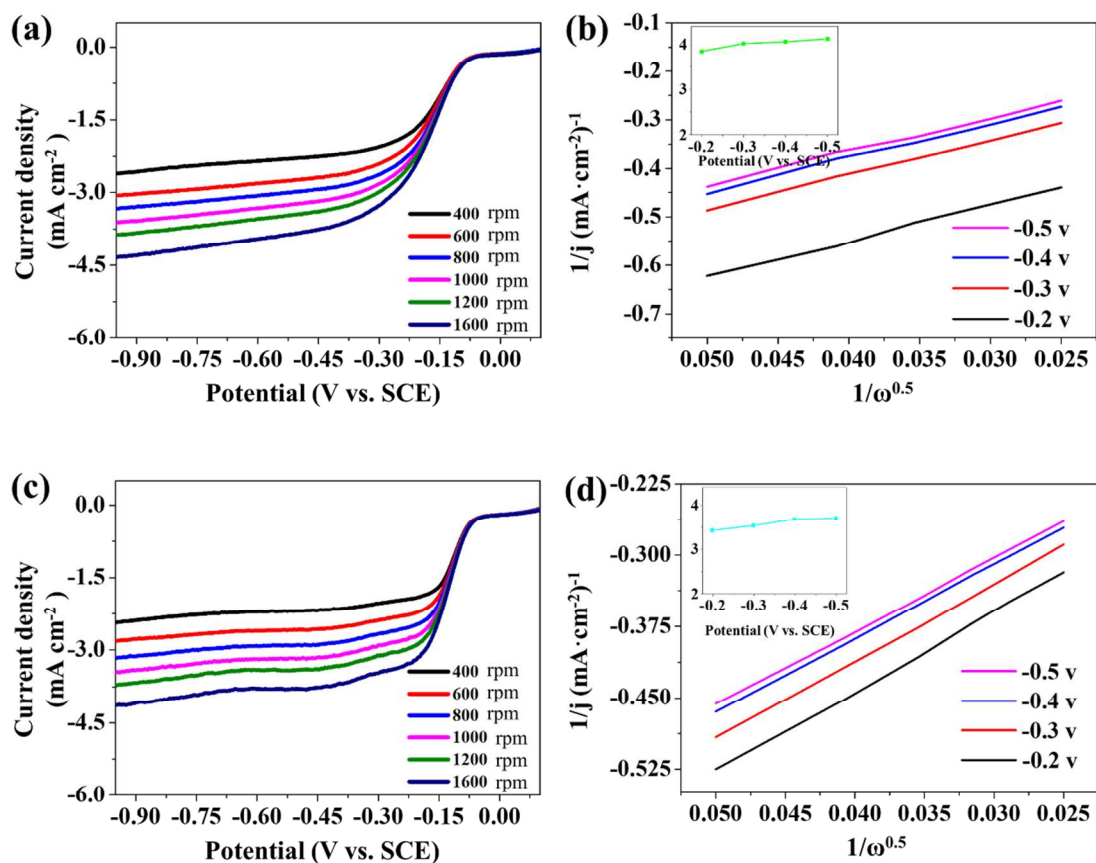

Figure S7. The LSV curves of CoS@NSC-700 (a) and CoS@NSC-900 (c) at rotation speed from 400 to 1600 rpm in the  $O_2$  saturated 0.1M KOH solution at the scan rate of  $10 \text{ mVs}^{-1}$ . The K-L plots of CoS@NSC-700 (b) and CoS@NSC-900 (d), inset: the electron transfer number at different electrode potentials.

**Table S3. ORR electrocatalytic activity comparison between CoS@NSC-800 and other transitional metal catalysts at rotation speed of 1600 rpm in the O<sub>2</sub> saturated 0.1M KOH solution.**

| Sample                                                     | Loading amount<br>mg cm <sup>-2</sup> | Half-wave<br>potential<br>V | Limit current<br>density<br>mA cm <sup>-2</sup> | Current density<br>per loading<br>mA/mg |
|------------------------------------------------------------|---------------------------------------|-----------------------------|-------------------------------------------------|-----------------------------------------|
| CoS@NSC-800                                                | 0.3                                   | -0.134                      | -5.4                                            | -18                                     |
| Co@Co <sub>3</sub> O <sub>4</sub> @PPD <sup>[34]</sup>     | 0.25                                  | -0.141                      | -4.23                                           | -16.92                                  |
| CoS <sub>2</sub> (400)/N,S-GO <sup>[38]</sup>              | 0.25                                  | -0.22                       | -4.29                                           | -17.16                                  |
| NiCo <sub>2</sub> O <sub>4</sub> -G <sup>[46]</sup>        | 0.4                                   | -0.316                      | -4.21                                           | -10.525                                 |
| Fe-N-C <sup>[58]</sup>                                     | 0.2                                   | -0.172                      | -4.96                                           | -24.8                                   |
| N-Co <sub>9</sub> S <sub>8</sub> /G <sup>[62]</sup>        | 0.2                                   | -0.245                      | -5.7                                            | -28.5                                   |
| Co <sub>0.5</sub> Fe <sub>0.5</sub> S@N-MC <sup>[63]</sup> | 0.8                                   | -0.182                      | -5                                              | -6.25                                   |

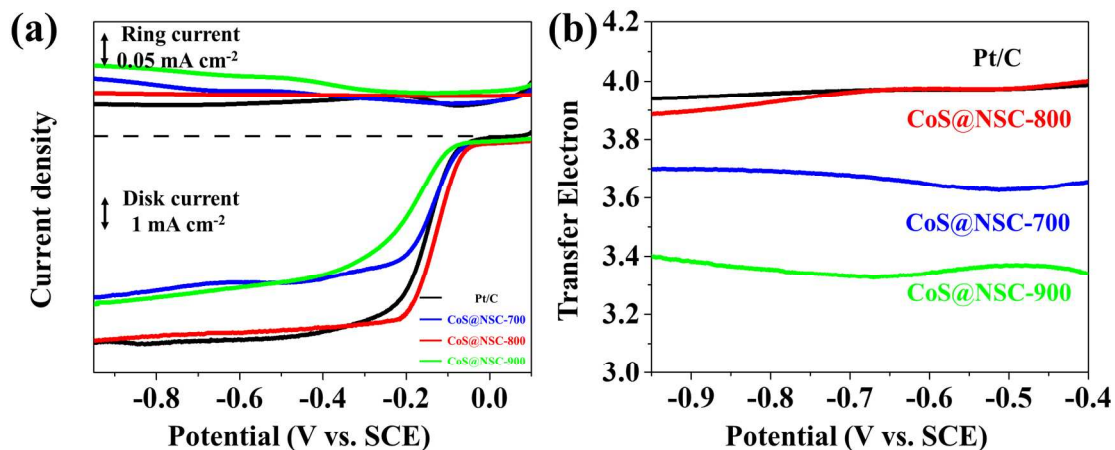

Figure S8. The LSV curves of CoS@NSC-700, CoS@NSC-800, CoS@NSC-900 and Pt/C catalysts on a glassy carbon rotating ring-disk electrode (RRDE) in O<sub>2</sub> saturated 0.1 M KOH solution with a scan rate of 10 mV s<sup>-1</sup> and rotation speed of 2000 rpm.

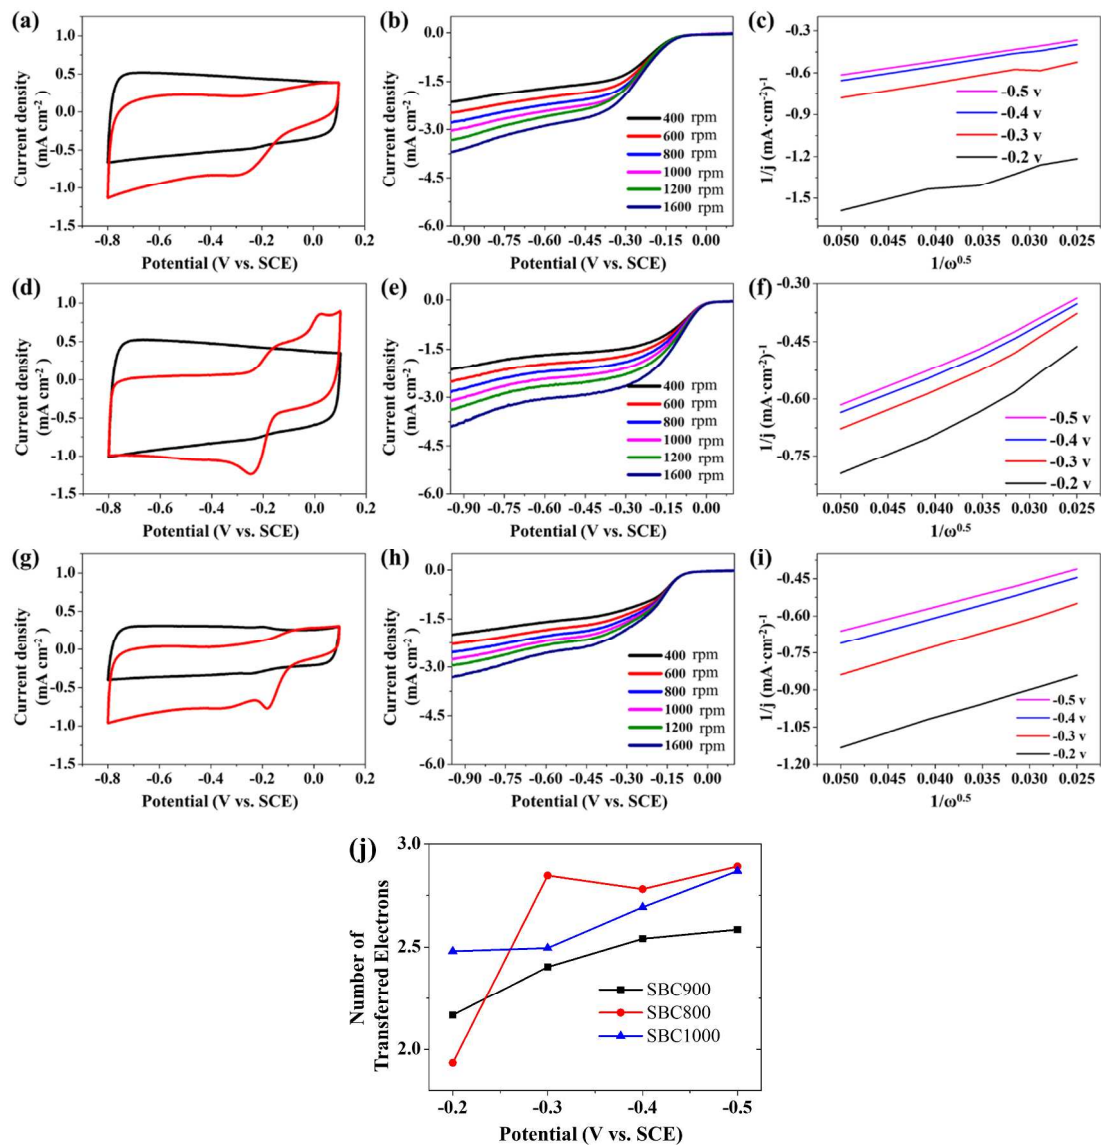

Figure S9. CV and LSV curves and the K-L plots of NSC-700 (a, b, c), NSC-800 (d, e, f) and NSC-900 (g, h, i) in  $O_2$ -saturated 0.1 M KOH solution. Electron transfer number of NSC-700, NSC-800 and NSC-900 at different electrode potential (j).

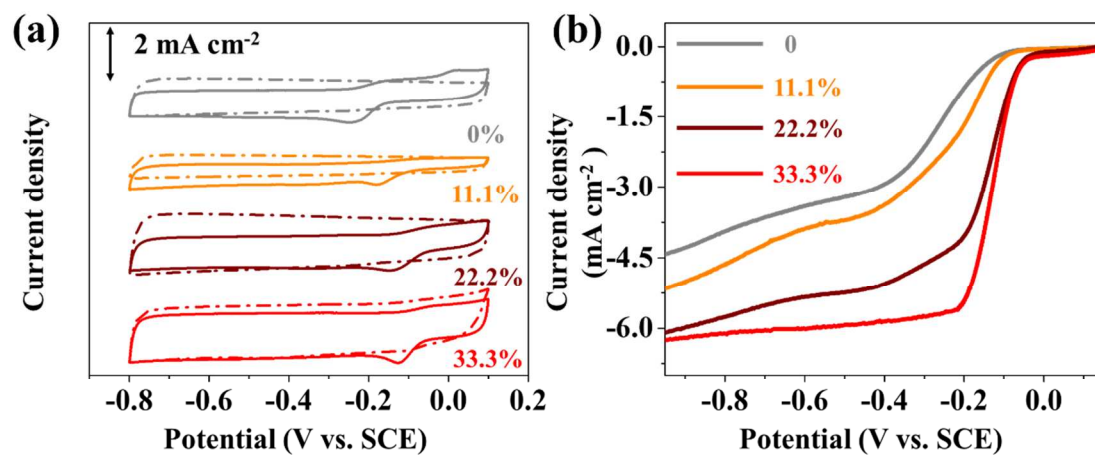

Figure S10. CV and LSV curves of the samples treated by  $\text{Co}(\text{NO}_3)_2$  aqueous solution with various mass fraction of 0%, 11.1%, 22.2% and 33.3% which were carbonized at 800 °C.



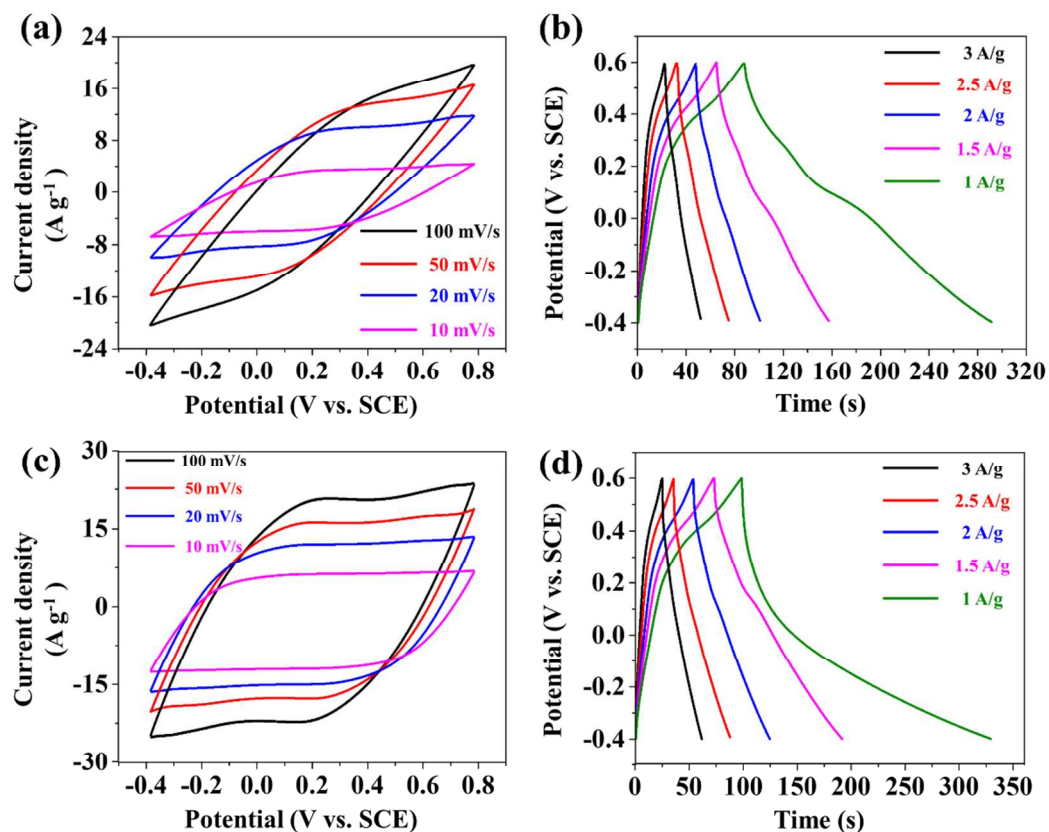

**Figure S11.** CV curve of CoS@NSC-700 (a) and CoS@NSC-900 (c) at different scan rate from 10 to 100  $\text{mV S}^{-1}$ . Galvanostatic charge/discharge curves of CoS@NSC-700 (b) and CoS@NSC-900 (d) with different current density at a potential window of -0.4 V to 0.6 V in 6 M KOH solution.

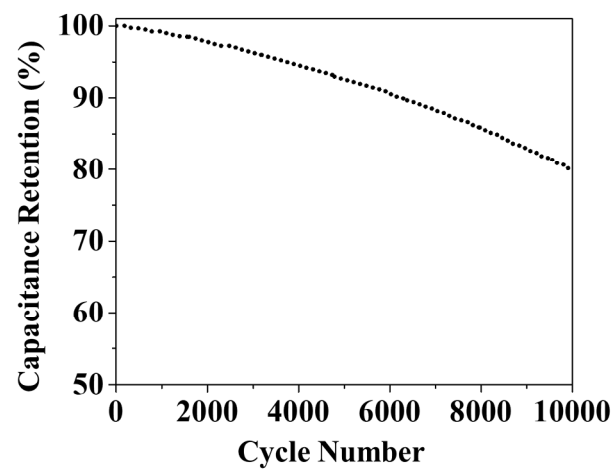

**Figure S12.** Cyclic stability of CoS@NSC-800 with a current density of 5 A/g in 6 M KOH solution at room temperature.
